# Supplementary material for: Molecular basis of the microtubule-regulating activity of microtubule crosslinking factor 1
Source: PubMed Central journal article supplement (PMC5546597; doi:10.1371/journal.pone.0182641), 2017-08-07
Supplement: pone.0182641.s001.pdf [file pone.0182641.s001.pdf]

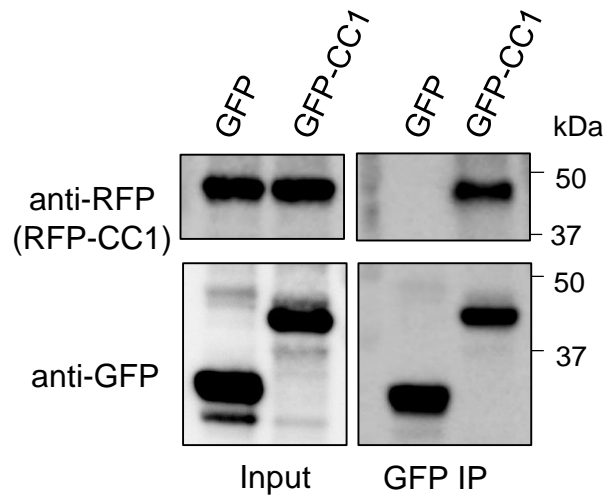

**S1 Fig. CC1 shows a homo-interaction *in vivo*.**

Immunoprecipitation assays were performed using an anti-GFP antibody and extracts of HEK293T cells co-expressing GFP or GFP-tagged CC1 and RFP-tagged CC1.
