# Supplementary material for: Molecular basis of the microtubule-regulating activity of microtubule crosslinking factor 1
Source: PubMed Central journal article supplement (PMC5546597; doi:10.1371/journal.pone.0182641), 2017-08-07
Supplement: pone.0182641.s003.pdf [file pone.0182641.s003.pdf]

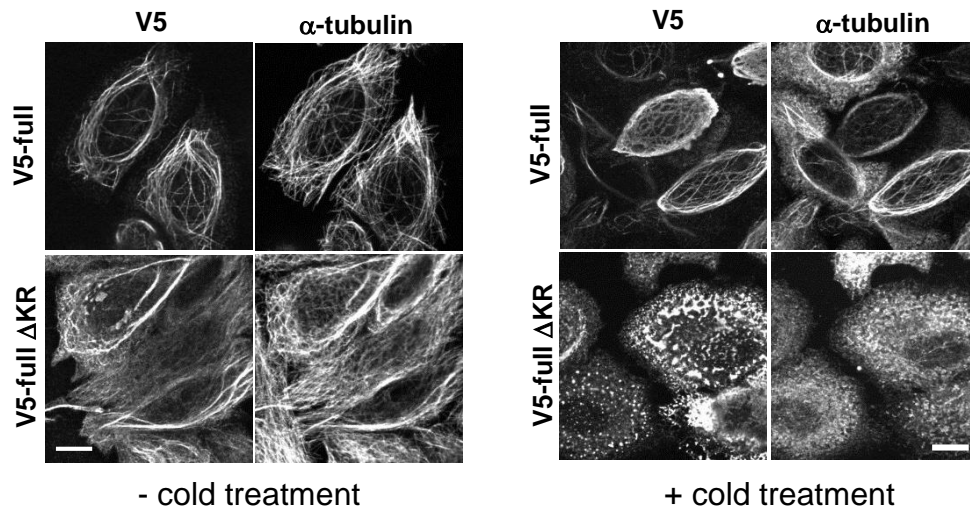

**S3 Fig. MTCL1 cannot stabilize MTs without C-MTBD.** Immunostaining of V5 and  $\alpha$ -tubulin in HeLa-K cells expressing V5-MTCL1 full wt and its mutant lacking C-MTBD (full $\Delta$ KR). Right panels show cells fixed after cold treatment on ice for 1 h. Scale bars, 10  $\mu$ m.
