# Supplementary material for: Molecular basis of the microtubule-regulating activity of microtubule crosslinking factor 1
Source: PubMed Central journal article supplement (PMC5546597; doi:10.1371/journal.pone.0182641), 2017-08-07
Supplement: pone.0182641.s005.pdf [file pone.0182641.s005.pdf]

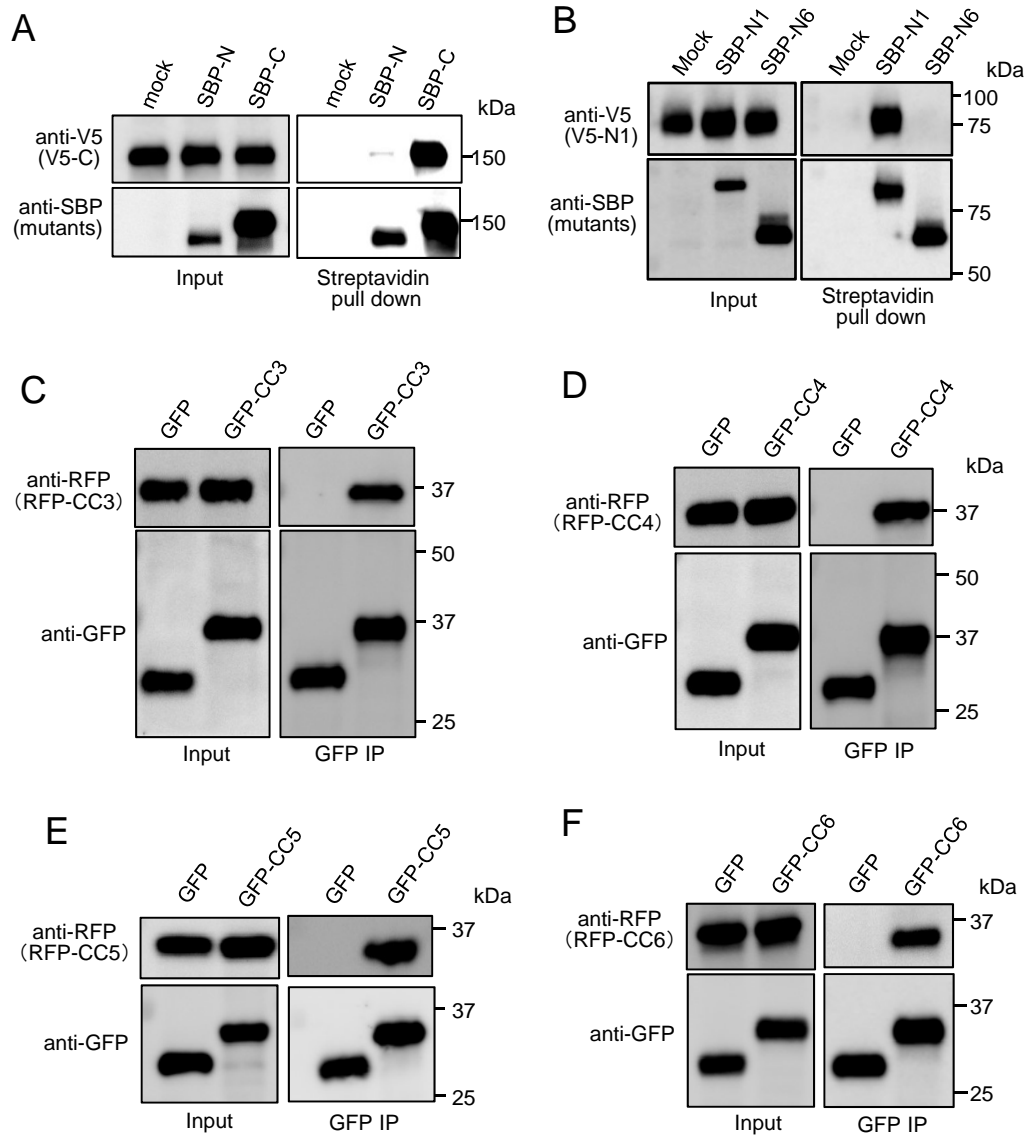

**S5 Fig. Supplementary data for identification of homo-interaction regions in the MTCL1 N-terminus.** Streptavidin pull-down assays performed with extracts of HEK293T cells co-expressing the indicated MTCL1 mutants. (A) The C fragment interacts with itself, but not with the N fragment. (B) The N1 fragment interacts with itself, but not with the N6 fragment. (C–F) Immunoprecipitation assays by anti-GFP antibody examining interactions of RFP-CC3 (C), CC4 (D), CC5 (E) or CC6 (F) with the indicated GFP proteins.
