# Supplementary material for: Molecular basis of the microtubule-regulating activity of microtubule crosslinking factor 1
Source: PubMed Central journal article supplement (PMC5546597; doi:10.1371/journal.pone.0182641), 2017-08-07
Supplement: pone.0182641.s006.pdf [file pone.0182641.s006.pdf]

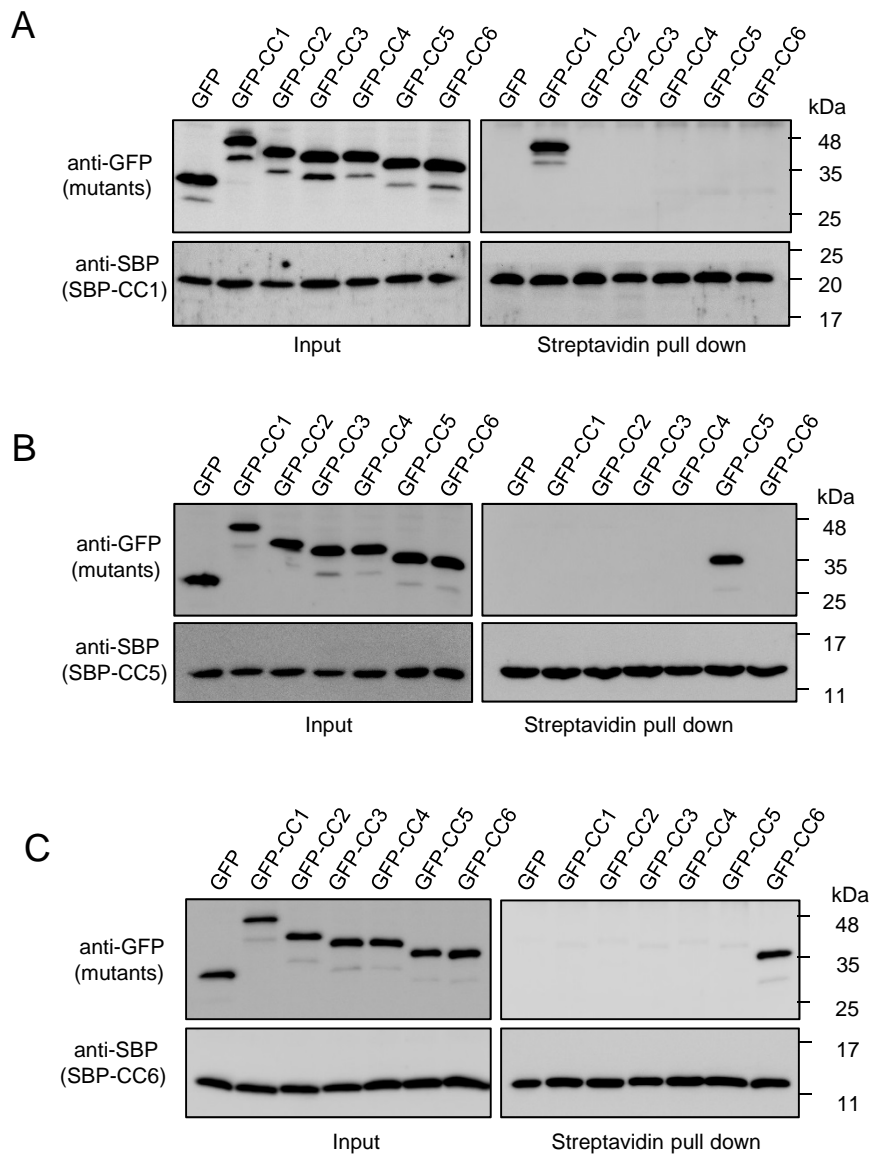

**S6 Fig. N-terminal CCs show highly specific homo-interactions.** Streptavidin pull-down assays performed with extracts of HEK293T cells co-expressing SBP-CC1 (A), CC5 (B) or CC6 (C) and the indicated GFP-fusion proteins of the N-terminal CCs.
