# Supplementary material for: Molecular basis of the microtubule-regulating activity of microtubule crosslinking factor 1
Source: PubMed Central journal article supplement (PMC5546597; doi:10.1371/journal.pone.0182641), 2017-08-07
Supplement: pone.0182641.s007.pdf [file pone.0182641.s007.pdf]

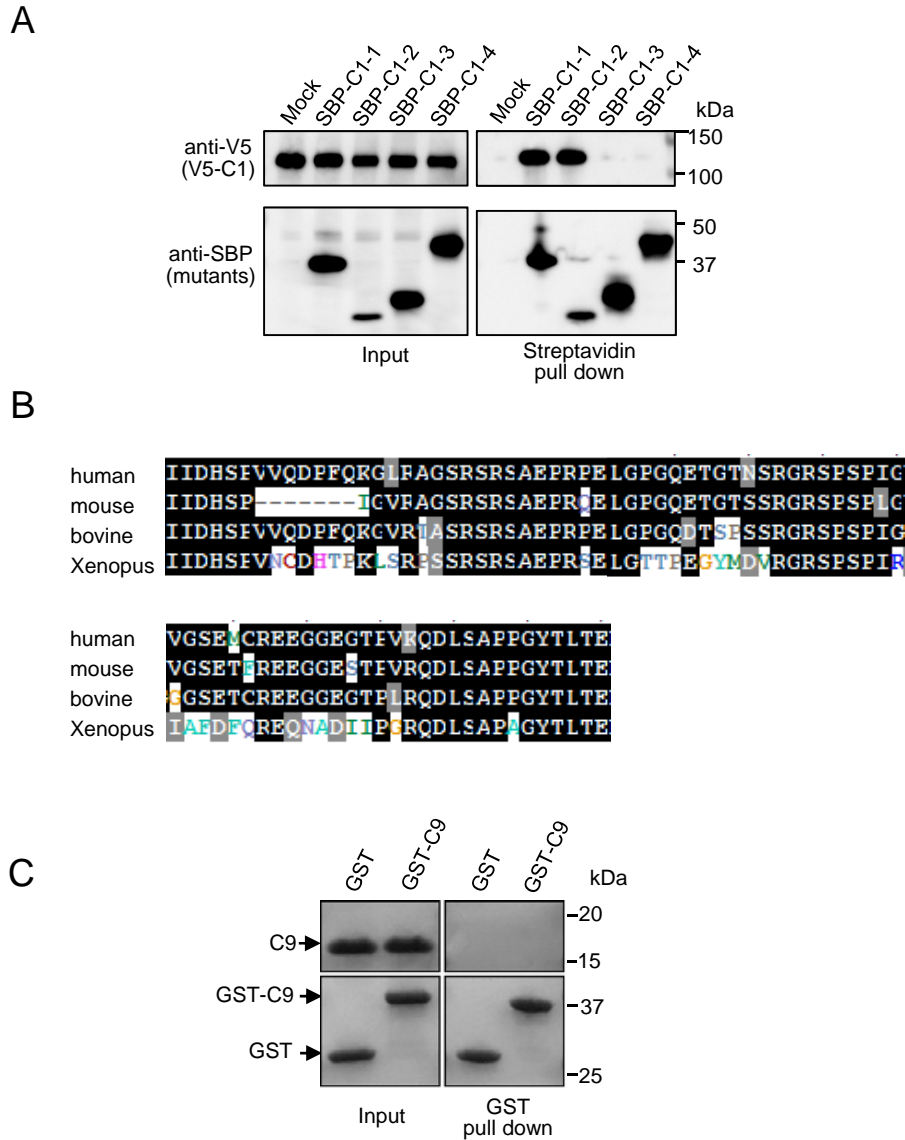

**S7 Fig. Supplementary data for identification of homo-interaction regions in the MTCL1 C-terminus.** (A) Streptavidin pull-down assays performed with extracts of HEK293T cells co-expressing SBP-tagged mutants and V5-tagged C1. (B) Alignment of the amino acid sequence of C9. (C) GST pull-down assays performed with a mixture of purified C9 fragment and GST or GST-C9.
