# Supplementary material for: Molecular basis of the microtubule-regulating activity of microtubule crosslinking factor 1
Source: PubMed Central journal article supplement (PMC5546597; doi:10.1371/journal.pone.0182641), 2017-08-07
Supplement: pone.0182641.s008.pdf [file pone.0182641.s008.pdf]

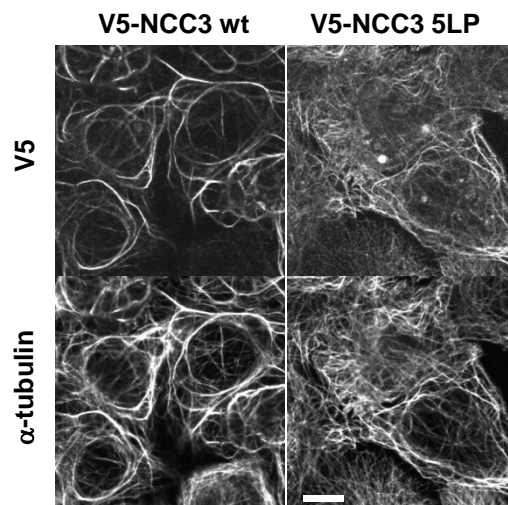

**S8 Fig.** Effect of the 5LP mutation in CC1 on the MT-crosslinking activity of V5-NCC3. Immunostaining of V5 and  $\alpha$ -tubulin in HeLa-K cells expressing V5-NCC3 wt and its 5LP mutant. Scale bars, 10  $\mu$ m.
