# Supplementary material for: Molecular basis of the microtubule-regulating activity of microtubule crosslinking factor 1
Source: PubMed Central journal article supplement (PMC5546597; doi:10.1371/journal.pone.0182641), 2017-08-07
Supplement: pone.0182641.s010.pdf [file pone.0182641.s010.pdf]

Amino acid numbers of mouse MTCL1 covered by each mutants

| name    | amino acid number |
|---------|-------------------|
| N       | 1-916             |
| N1      | 1-508             |
| N2      | 1-366             |
| N3      | 209-515           |
| N4      | 1-241             |
| N6      | 491-916           |
| N8      | 721-826           |
| N9      | 827-916           |
| NCC1    | 1-432             |
| NCC3    | 1-548             |
| NCC4    | 1-607             |
| CC1+CC2 | 318-487           |
| CC3+CC4 | 491-607           |
| CC5+CC6 | 619-720           |
| CC1     | 318-406           |
| CC2     | 408-487           |
| CC3     | 491-548           |
| CC4     | 540-611           |
| CC5     | 619-670           |
| CC6     | 672-720           |

| name           | amino acid number |
|----------------|-------------------|
| C              | 917-1945          |
| C1             | 916-1680          |
| C1-1           | 916-1133          |
| C1-2           | 1134-1270         |
| C1-3           | 1271-1415         |
| C1-4           | 1416-1680         |
| C2             | 1508-1945         |
| C3             | 1583-1945         |
| C4             | 1680-1945         |
| C5             | 1767-1945         |
| C2 $\Delta$ C5 | 1508-1766         |
| C6             | 1762-1861         |
| C7             | 1850-1945         |
| C8             | 1819-1858         |
| C9             | 1762-1834         |
